# Supplementary material
Source: ML conference proceedings conference paper supplement (https://aclanthology.org/W15-3023)

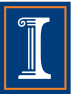

ILLINOIS

---

UNIVERSITY OF ILLINOIS AT URBANA-CHAMPAIGN

Supplement: Supplementary [file W15-3023.Supplementary.zip]

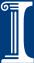

Supplement: Supplementary [file W15-3023.Supplementary.zip]
